# Supplementary material
Source: Elsevier journal article supplement (https://www.sciencedirect.com/science/article/pii/S0213911114001988)
Supplement: mmc1 [file S0213911114001988:mmc1.doc]

**Anexo**

1. **Sesión conjunta con los profesionales del CMS Usera (abril 2012)**

*Descripción-objetivos:* el objetivo de esta primera sesión fue establecer un primer contacto, además de abrir un espacio a las posibles colaboraciones e intercambios entre profesionales.

*Metodología:* el equipo de profesores e investigadores de la Facultad de Bellas Artes presentó al equipo de profesionales del centro las posibilidades y relaciones del arte y la creación artística con respecto a la salud. Los profesionales del centro municipal de promoción de la salud (Centro Madrid Salud [CMS] de Usera) expusieron, a su vez, sus retos y necesidades en sus actividades de prevención y promoción de la salud. A partir de éstas, los profesores e investigadores de la Facultad de Bellas Artes presentaron un *Banco común de imágenes sobre arte y salud,* partiendo de la selección de imágenes de artistas contemporáneos que tratan de forma directa o indirecta temas de salud en sus propuestas artísticas (Sarah Lucas, Wim Delvoye, Louise Bourgeois, etc.). Estas imágenes con un componente estético permitieron entablar un diálogo entre los profesionales de ambos ámbitos.

*Participantes:* una profesora y dos investigadoras de la Facultad de Bellas Artes; personal del CMS Usera: pediatra, tres enfermeras, sexóloga, psicólogo y psiquiatra.

*Evaluación y resultados:* de esta primera sesión surgieron las dos primeras iniciativas conjuntas, la primera médico-psiquiatra del centro que ofreció sus grupos de *Psicohigiene* para iniciar un proyecto conjunto con una de las investigadoras (ver «Espacio propio»), y la responsable del centro se comprometió a tutorizar a los estudiantes de grado que presentaran proyectos.

1. **Talleres sobre sexualidad con adolescentes (abril 2012)**

*Descripción-objetivos:* colaboración entre el personal del CMS y el profesorado de la Facultad de Bellas Artes en las sesiones realizadas con adolescentes, incorporando imágenes de artistas contemporáneos (Sarah Lucas) y de audiovisuales (videoclips de *Calle 13* y *Daddy Yankee*), con el objetivo de encontrar nuevas dinámicas para favorecer el diálogo y la comunicación con los participantes sobre conceptos básicos de sexualidad. En la primera sesión se trabajó en la descripción de los órganos sexuales femeninos y masculinos, y de los cambios durante el crecimiento. En la segunda sesión se presentaron temas más concretos sobre sexualidad y prevención.

*Método de captación:* el CMS Usera trabaja con las diferentes asociaciones y ONG del entorno ofreciéndoles programas de educación sexual y asesoría sexológica especializada. En estas sesiones se trabajó con un grupo de adolescentes del Centro de Adolescentes y Jóvenes ASPA Nº 4 (Buenavista/Carabanchel).

*Participantes:* siete adolescentes (12-17 años), dos enfermeras y sexóloga del CMS, una profesora y una investigadora de la Facultad de Bellas Artes, y la trabajadora social del ASPA responsable del grupo.

*Metodología:* la primera sesión se inició con un *ready-made* de una obra de la artista británica Sarah Lucas, *Two Fried Eggs and a Kebab* (2000). Los adolescentes se encontraron con un kebab y dos huevos fritos sobre una mesa, y a partir de esta representación de los órganos genitales femeninos se comenzó la sesión a cargo de las profesionales (enfermeras). Para la segunda sesión, se había pedido a los participantes que trajeran la letra de su canción favorita. Utilizando esta información, se llevaron a la sesión los videoclips de esas canciones, que se proyectaron justo al final de la sesión sobre sexualidad, y se estableció un debate a partir de los estereotipos sexuales femeninos y masculinos que aparecen en la música que suelen escuchar y en los audiovisuales que suelen consumir.

*Evaluación y resultados:* el objetivo de estas sesiones era favorecer el diálogo, generar nuevas dinámicas y poner de manifiesto si utilizar algunos de los artistas que habían surgido en el *Banco común de imágenes sobre arte y salud* eran compatibles en un contexto real.

1. **«Espacio propio»: proyecto desarrollado entre marzo y junio de 2012 por la psiquiatra del centro Lola Claver y la profesora Marta G. Cano**

*Descripción-objetivos:* se trabajó con un grupo de mujeres de 50 a 70 años de edad en riesgo de depresión profunda, aislamiento y soledad, que realizaban terapia grupal una vez a la semana. En este grupo se incorpora la artista con el objeto de aportar nuevas herramientas a la labor de la psiquiatra.

*Metodología*: en esta colaboración la propuesta fue trabajar desde los espacios cotidianos y propios (el CMS de Usera, la casa y el barrio). El objetivo era potenciar el trabajo en grupo y la interacción de éste8, con el fin de encontrar lugares comunes que devuelvan al grupo una imagen desde fuera en la cual apoyar otras reflexiones. El trabajo se planteó a partir del dibujo de los espacios y su descripción verbal desde una perspectiva formal, pero también desde la percepción de las emociones que esos espacios proyectaban en las participantes.

*Participantes:* 15 mujeres de 50 a 70 años de edad en riesgo de depresión profunda, aislamiento y soledad, que realizaban terapia grupal una vez a la semana.

*Evaluación:* tanto los profesionales del centro como los de la Facultad de Bellas Artes se plantearon esta primera experiencia como una propuesta piloto para encontrar mecanismos que pudieran encontrar nuevas vías y espacios para la comunicación con estos grupos. En esta primera intervención se pusieron de manifiesto la falta de recursos de expresión en muchos sentidos y la falta de espacios propios de la gran mayoría de las participantes del grupo. Entre otras apreciaciones, se planteó la conveniencia de desarrollar un proyecto más profundo en el cual el taller artístico con el grupo fuera más intenso, ofreciera más recursos y tuviera un espacio propio, independiente del espacio de la terapia, aunque sin dejar la posibilidad de observación entre profesionales en sus contextos habituales para enriquecer la percepción y el trabajo con el grupo.

1. **«CMYK», «Un salón para todos», «Atención y retención» y «MESA»: cuatro intervenciones y microproyectos desarrollados por estudiantes de licenciatura y grado en Bellas Artes (octubre 2012-junio 2013)**

*Descripción-objetivos:* acercar este contexto a los estudiantes para realizar proyectos artísticos en situaciones reales e incorporar nuevas dinámicas al centro.

*Metodología:* para explicar estas propuestas es necesario señalar que surgen tras una sesión (impartida por la responsable del CMS Usera) en la Facultad de Bellas Artes, en la cual se presentaron a los estudiantes los programas de prevención y la realidad del centro en concreto. A partir de esta sesión, los estudiantes diseñaron unas propuestas que fueron valoradas por la responsable del centro, quien se encargó de la captación del grupo de usuarios más adecuado para cada una de las propuestas. Una vez escogido el grupo se realizó una sesión con la responsable del centro para perfilar y adaptar bien las propuestas atendiendo a las necesidades y las particularidades del grupo, y se establecieron las fechas. « “CMYK»” trabajó con el uso del color y la música en los talleres de memoria6 como herramienta creativa para la comunicación. En «; “Un salón para todos”, se diseñóaron el salón ideal con jóvenes de entre 15 y a 17 años del barrio, junto con talleres de fotografía, restauración de muebles y *coaching*9;. En « “Atención y retención» se”, trabajaron las mMeninas “vacías” en los talleres de memoria, trabajando con la memoria visual a partir de este cuadro tan reconocido. «, y “MESA»”, planteóaron una propuesta creativa para trabajar temas de alimentación a partir de recetas9.

*Pticipntes:* eEn total, en estos cuatro microproyectos participaron 13 estudiantes de la Facultad de Bellas Artes. 12 Doce usuaride los talleres de mmoria partaron en « “CMYK»” y «“Atención encn»; ocho”, un grupo de 8 mujeres en el proyecto MESA; y «“Un salón para todos» fue el”, sindo unroyecto más complejo y eeso en el tiempo,contó con la participación de un grupo de 20 estudiantes, de entre 15 y a 17 años de edad, de 4º de la ESdel I.E.S. longoTdos estroyectos fueron coordinados por la responsable del centro con el apoyo del personal que normalmente está con cada uno de estos los grupos.

*Evaluación y resltados:* las cuatro dinámicas fueron valoradas muy positivamente tanto por parte de los participanteomo del personal que participó en ellas. Una de las reciaione más positivs fue que los ern desarrollar sus proyectos encontextos reales, valorandocia artística con grupos de participantes. A a los estudiantes de arte a contextos sociales e impls eacciones reales fue una de los aspectos más valorados por el profesorado de la Facultad de Bellas Artes, por los mismos estudiantes y también por los profesionales del CMS.
